# Supplementary material for: Isothermal Microcalorimetry Detects the Presence of Persister Cells in a Staphylococcus aureus Biofilm After Vancomycin Treatment
Source: PubMed Central journal article supplement (PMC6398423; doi:10.3389/fmicb.2019.00332), 2019-02-25
Supplement: Data_Sheet_1.pdf [file Data_Sheet_1.pdf]

## SUPPLEMENTARY INFORMATION

### **Isothermal microcalorimetry detects the presence of persister cells in a *Staphylococcus aureus* biofilm after vancomycin treatment**

Maria Eugenia Butini<sup>a,b</sup>, Gerardo Abbandonato<sup>c</sup>, Carmine Di Rienzo<sup>c,d</sup>, Andrej Trampuz<sup>a,b</sup> and  
Mariagrazia Di Luca<sup>a,b,c, e@</sup>

<sup>a</sup>Charité – Universitätsmedizin Berlin, corporate member of Freie Universität Berlin, Humboldt-Universität zu Berlin, and Berlin Institute of Health, Center for Musculoskeletal Surgery; Charitéplatz 1, 10117 Berlin, Germany

<sup>b</sup>Berlin-Brandenburg Center for Regenerative Therapies, Charité – Universitätsmedizin Berlin; Augustenburger Platz 1, 13353 Berlin, Germany

<sup>c</sup>NEST, Istituto Nanoscienze - Consiglio Nazionale delle Ricerche; Piazza San Silvestro 12, 10027 Pisa, Italy

<sup>d</sup>Center for Nanotechnology Innovation @ NEST, Istituto Italiano di Tecnologia, Pisa, Italy.

<sup>e</sup>Department of Biology, University of Pisa, via San Zeno 35-39, 56127 Pisa Italy

**@Corresponding author:** Dr. Mariagrazia Di Luca

Berlin-Brandenburg Center for Regenerative Therapies (BCRT)  
Charité – Universitätsmedizin Berlin  
Campus Virchow Klinikum  
Augustenburger Platz 1 (Südstraße 2)  
D-13353 Berlin  
Germany  
Email: [diluca.mariagrazia@gmail.com](mailto:diluca.mariagrazia@gmail.com)

**Running title: isothermal microcalorimetry reveals persister cells**

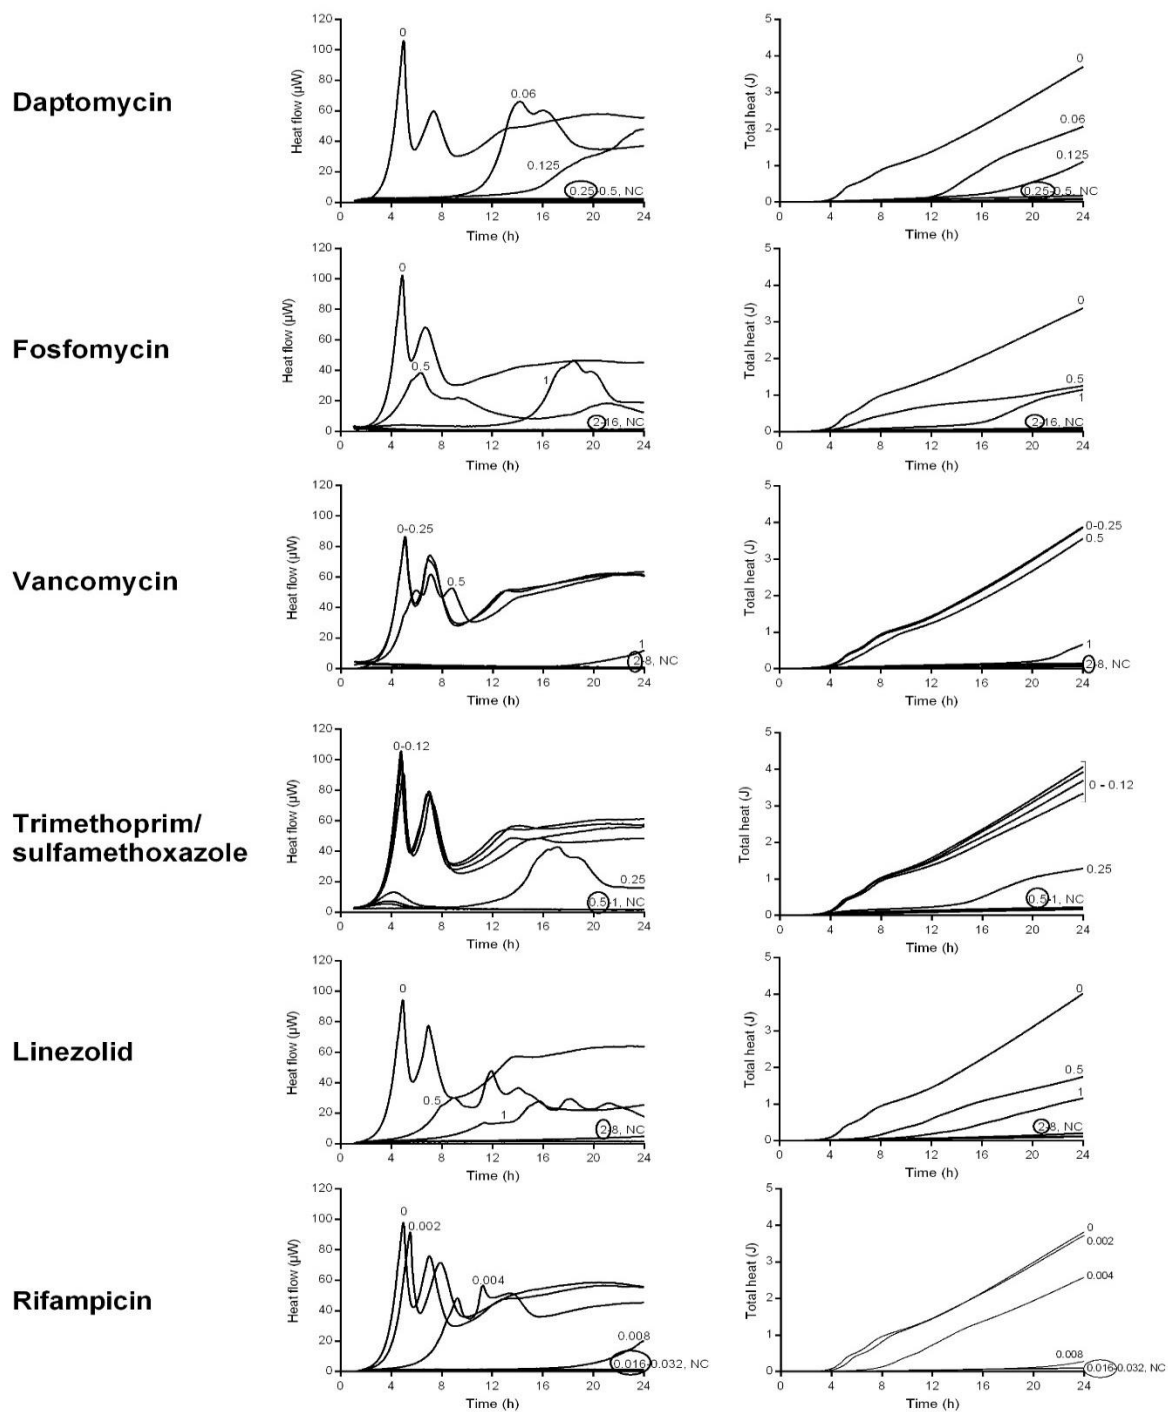

**Figure S1** Evaluation of antimicrobial activity of daptomycin, fosfomycin, vancomycin, trimethoprim/sulfamethoxazole, linezolid and rifampicin against planktonic MRSA by ITC. Numbers represent antibiotic concentrations ( $\mu\text{g/ml}$ ). Heat flow ( $\mu\text{W}$ ) and total heat (J) are plotted against time (h). A negative control has been used to confirm medium sterility (NC). Trimethoprim/sulfamethoxazole concentrations are expressed as the trimethoprim concentrations. Circled values represent the MHIC. Representative data of replicated experiments are reported.

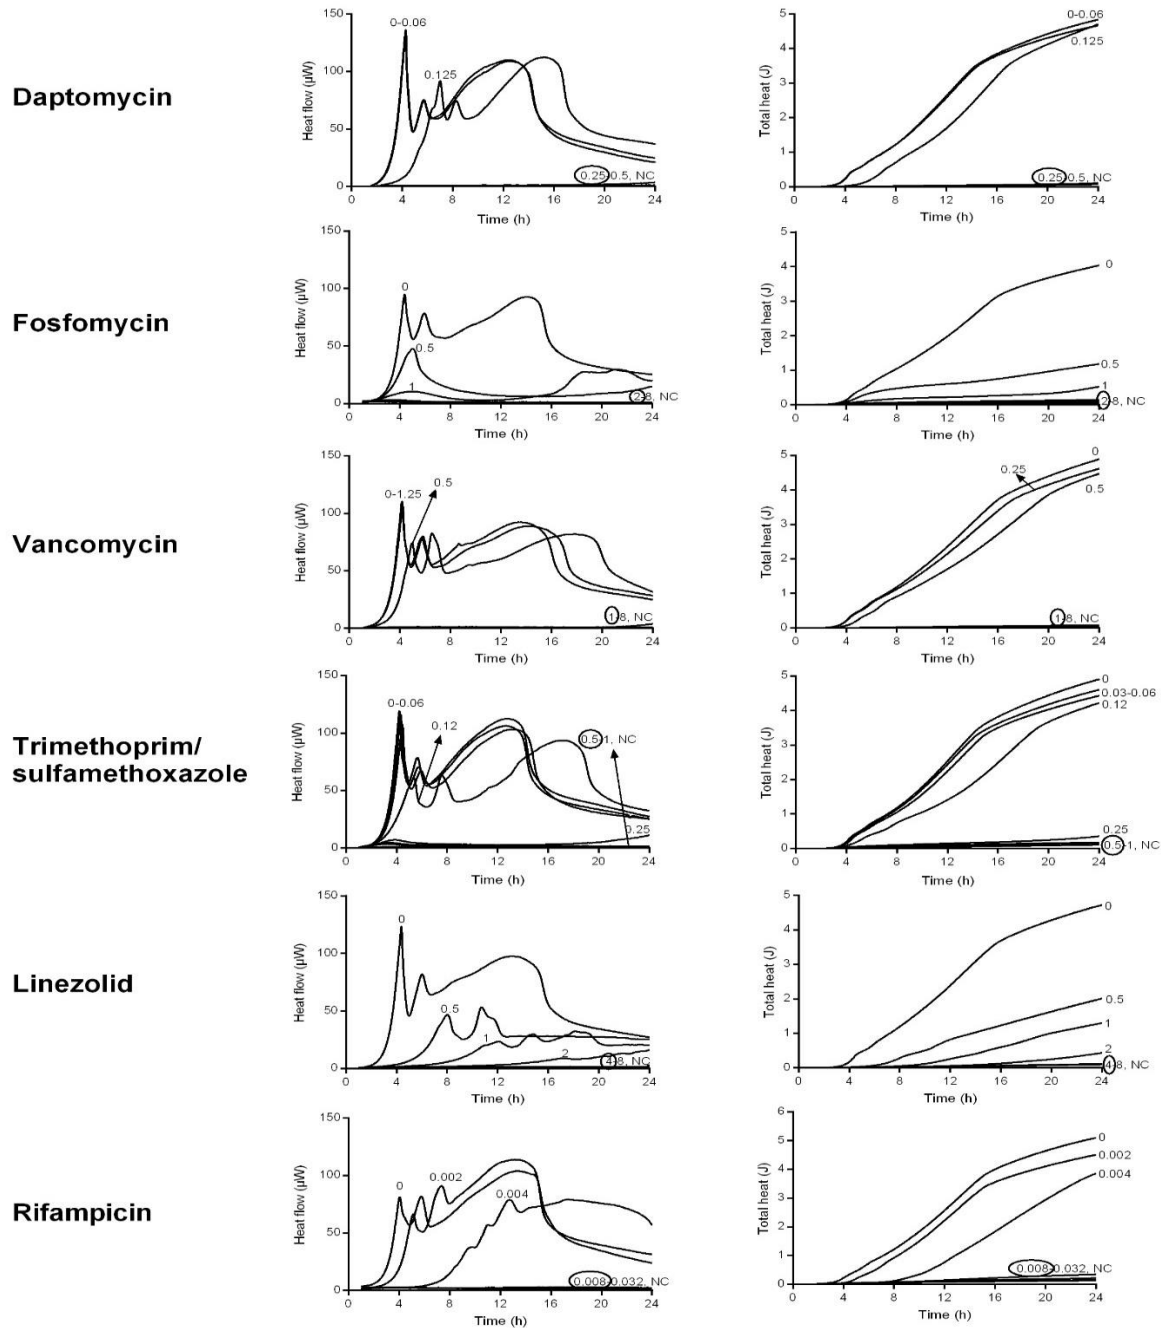

**Figure S2** IMC evaluation of antimicrobial activity of daptomycin (A), fosfomycin (B), vancomycin (C), trimethoprim/sulfamethoxazole (D), linezolid (E) and rifampicin (F) against planktonic MSSA by IMC. Numbers represent antibiotic concentrations ( $\mu\text{g/ml}$ ). Heat flow ( $\mu\text{W}$ ) and total heat (J) are plotted against time (h). A negative control has been used to confirm medium sterility (NC). Trimethoprim/sulfamethoxazole concentrations are expressed as the trimethoprim concentrations. Circled values represent the MHIC. Representative data of replicated experiments are reported.

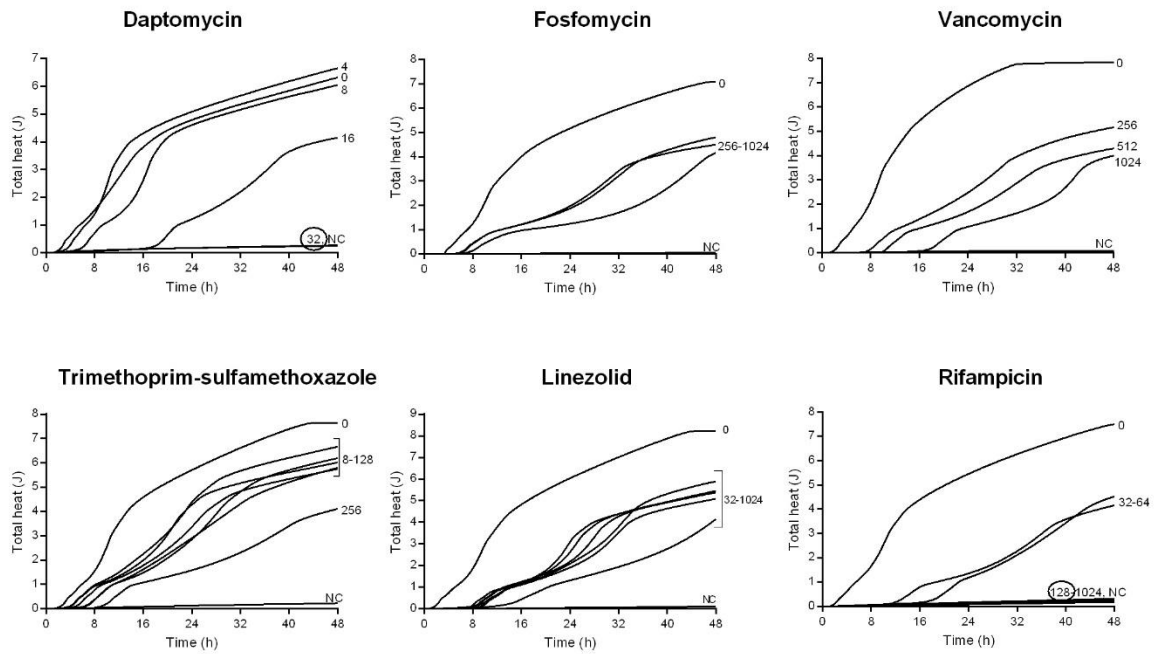

**Figure S3** IMC evaluation of antimicrobial activity of daptomycin, fosfomicin, vancomycin, trimethoprim/sulfamethoxazole, linezolid and rifampicin against biofilm MRSA by microcalorimetry. Numbers represent antibiotic concentrations ( $\mu\text{g/ml}$ ). Total heat (J) are plotted against time (h). A negative control has been used to confirm medium sterility (NC). Trimethoprim/sulfamethoxazole concentrations are expressed as the trimethoprim concentrations. Circled values represent the MBBC. Representative data of replicated experiments are reported.

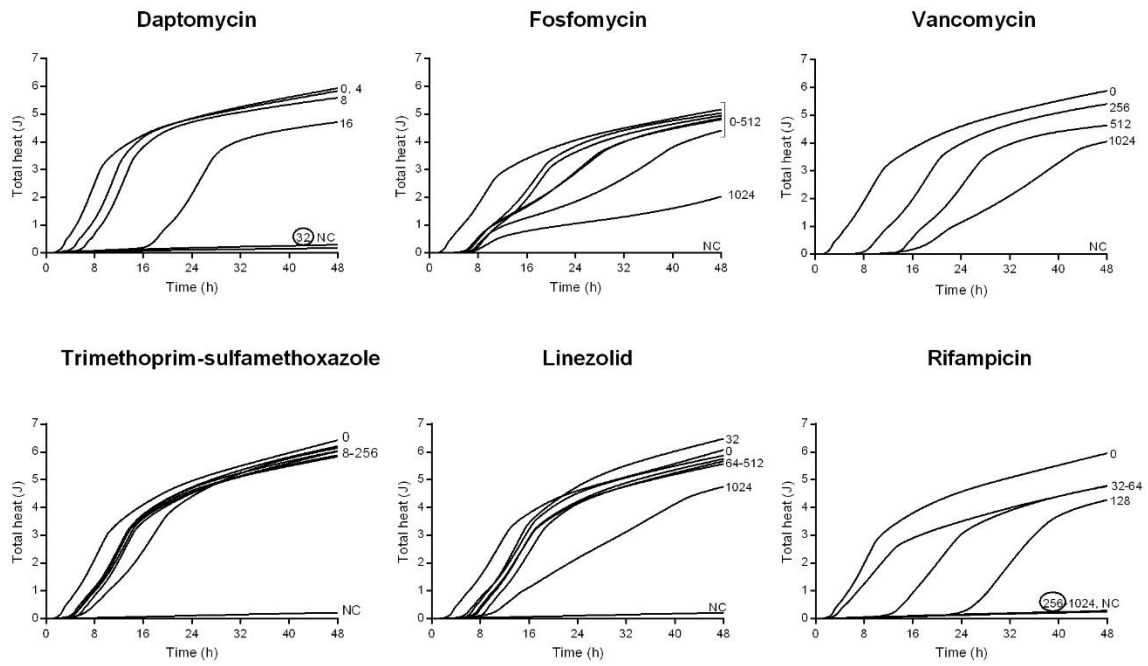

**Figure S4** Evaluation of antimicrobial activity of daptomycin, fosfomycin, vancomycin, trimethoprim/sulfamethoxazole, linezolid and rifampicin against biofilm MSSA by microcalorimetry. Numbers represent antibiotic concentrations ( $\mu\text{g}/\text{ml}$ ). Total heat (J) are plotted against time (h). A negative control has been used to confirm medium sterility (NC). Trimethoprim/sulfamethoxazole concentrations are expressed as the trimethoprim concentrations. Circled values represent the MBBC. Representative data of replicated experiments are reported.

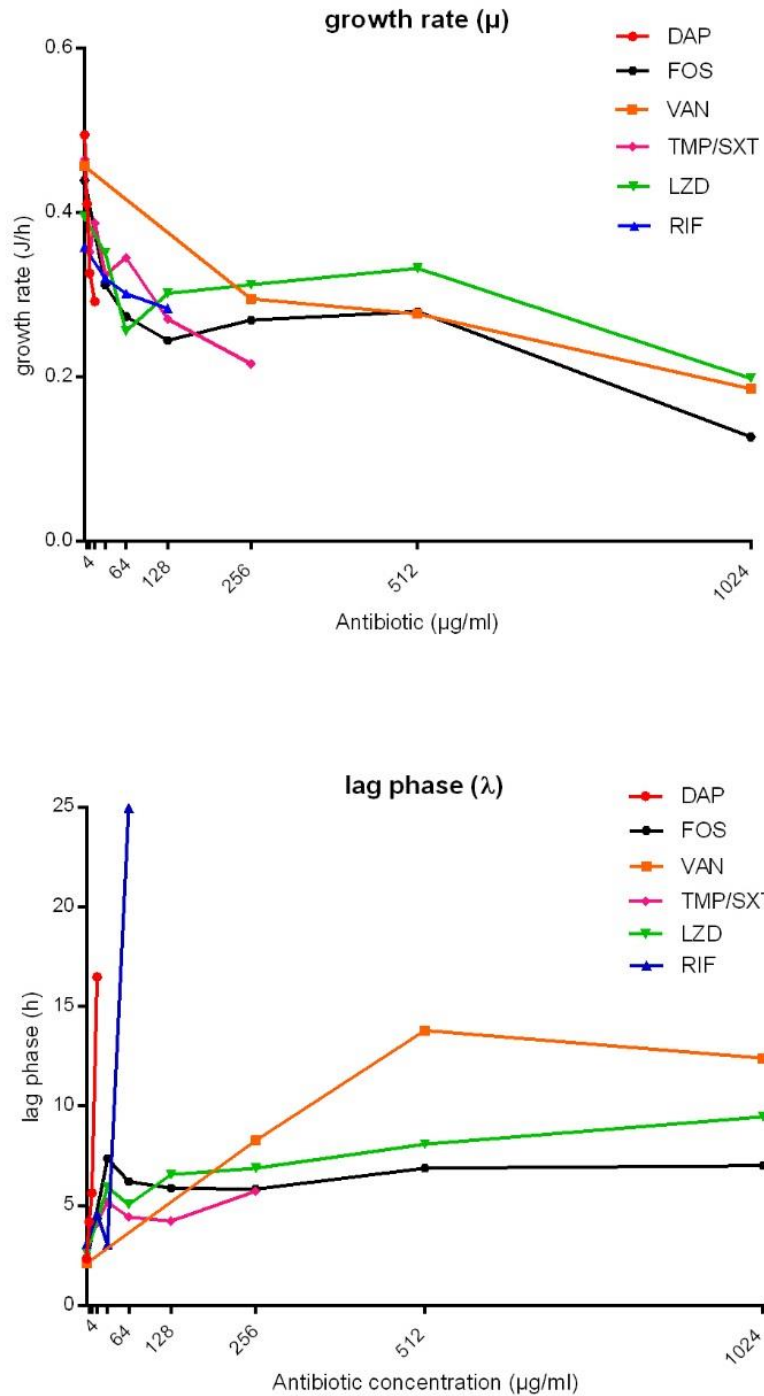

**Figure S5** Analysis of growth rate ( $\mu$ , J/h) and lag phase ( $\lambda$ , h) obtained from IMC data of MSSA biofilm treatment with daptomycin (DAP), fosfomycin (FOS), vancomycin (VAN), trimethoprim/sulfamethoxazole (TMP/SXT), linezolid (LNZ) and rifampicin (RIF). The bacterial growth rate ( $k$ , J/h) and the lag phase ( $\lambda$ , h) are plotted against antibiotic concentrations ranging from 4 to 1024  $\mu\text{g/ml}$ . TMP/SXT concentrations are expressed as trimethoprim concentrations.

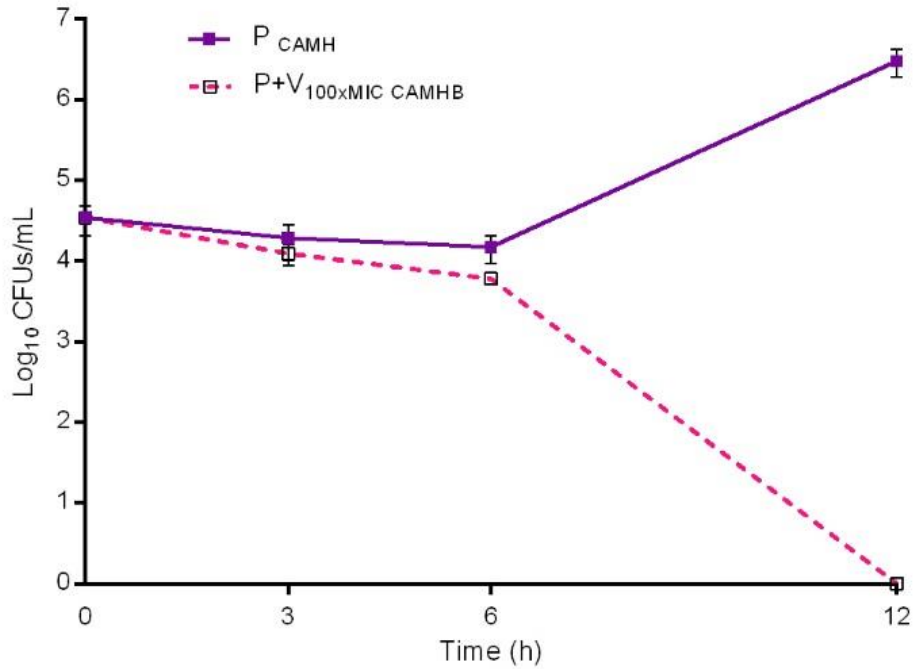

**Figure S6** Characterization of persister cells (P) isolated from MRSA biofilm after 24h-treatment with 1024  $\mu\text{g/ml}$  vancomycin. The exposure to high bactericidal vancomycin concentrations ( $100\times \text{MIC}_{\text{VAN}} = 100 \mu\text{g/ml}$ ) was evaluated by colony counting of MRSA persister cells ( $\text{Log}_{10}\text{CFUs/mL}$ ) during 12h-exposure to  $100 \mu\text{g/mL}$  vancomycin in CAMHB. P, persister cells in CAMHB without vancomycin; P+V<sub>100xMIC CAMHB</sub>; persister cells in CAMHB with 100xMIC vancomycin. Data are expressed as mean  $\pm$  SD, n=3.
